# Supplementary material
Source: PubMed Central journal article supplement (PMC4047751)

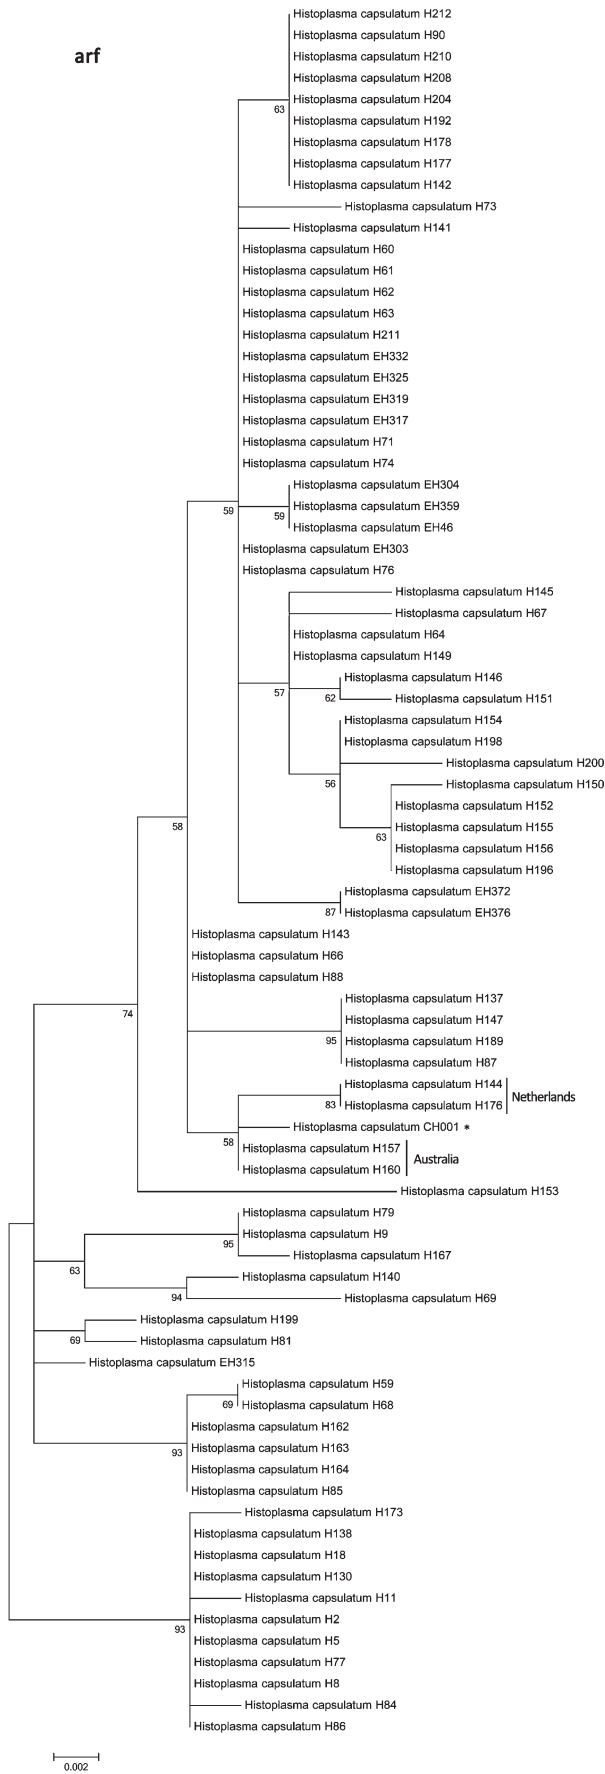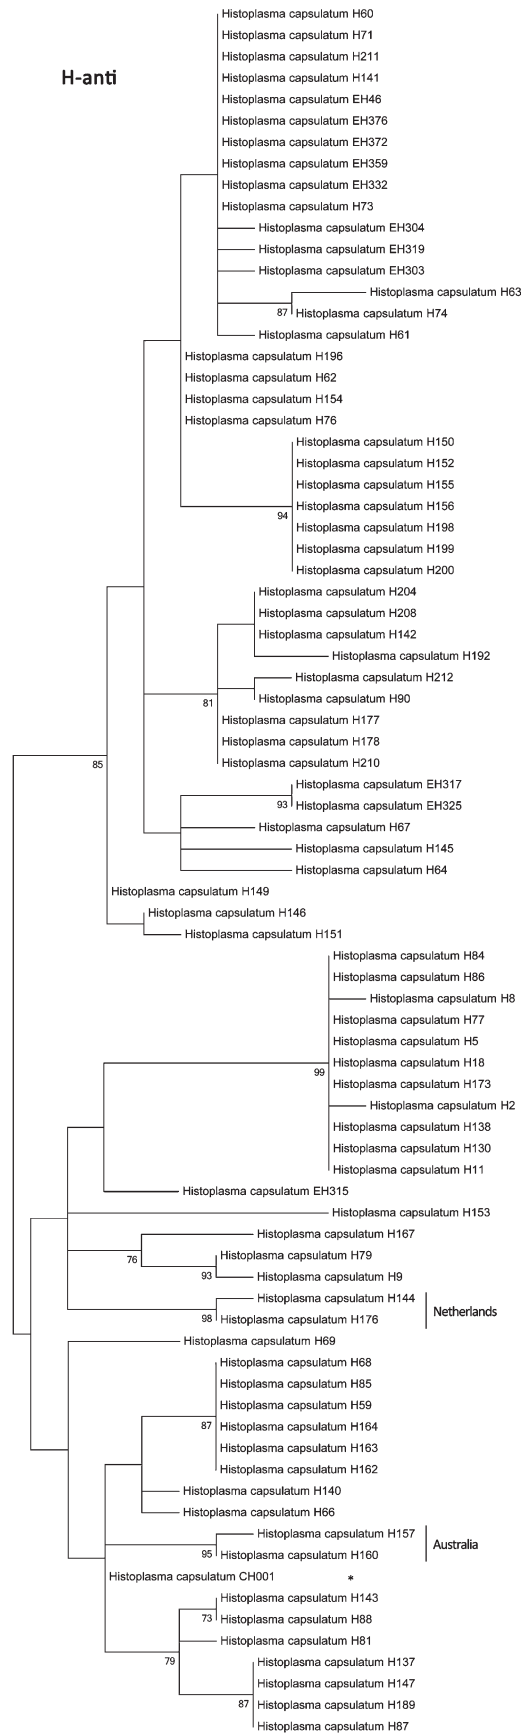

SUPPLEMENTAL FIGURE 1.

SUPPLEMENTAL FIGURE 2.

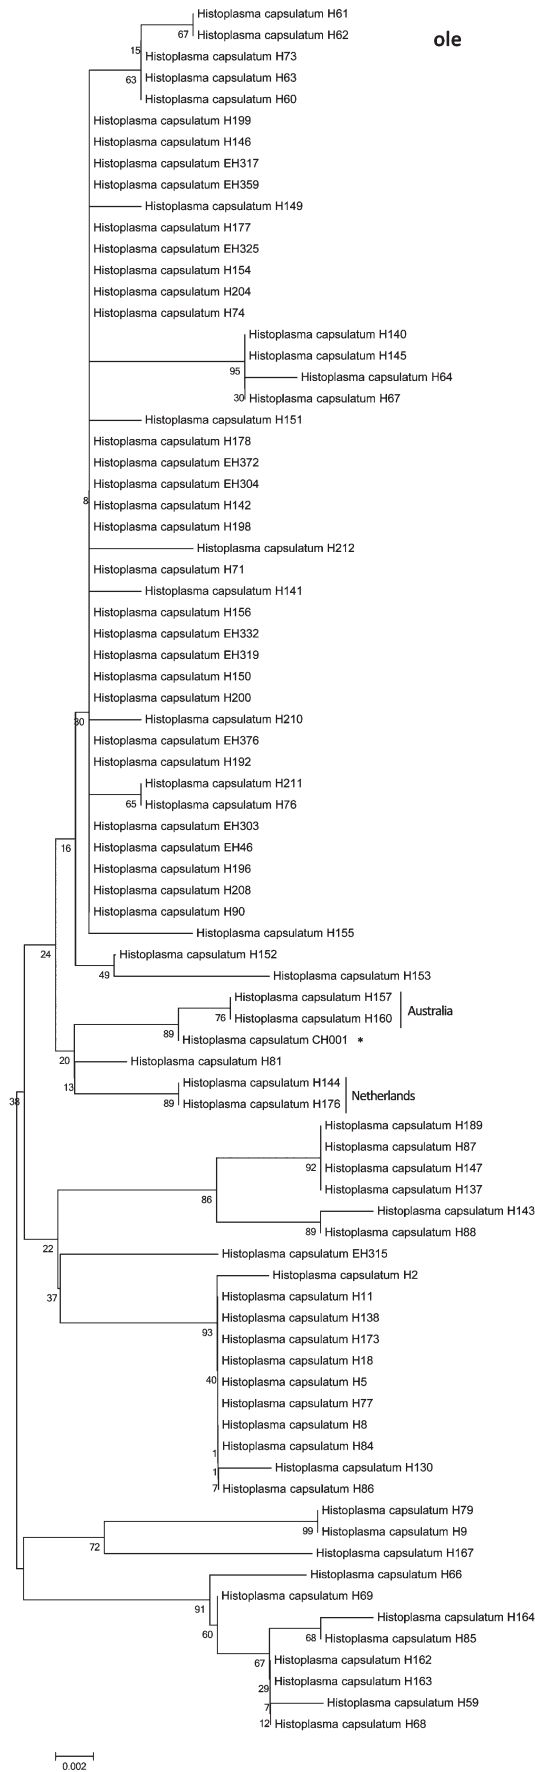

SUPPLEMENTAL FIGURE 3.

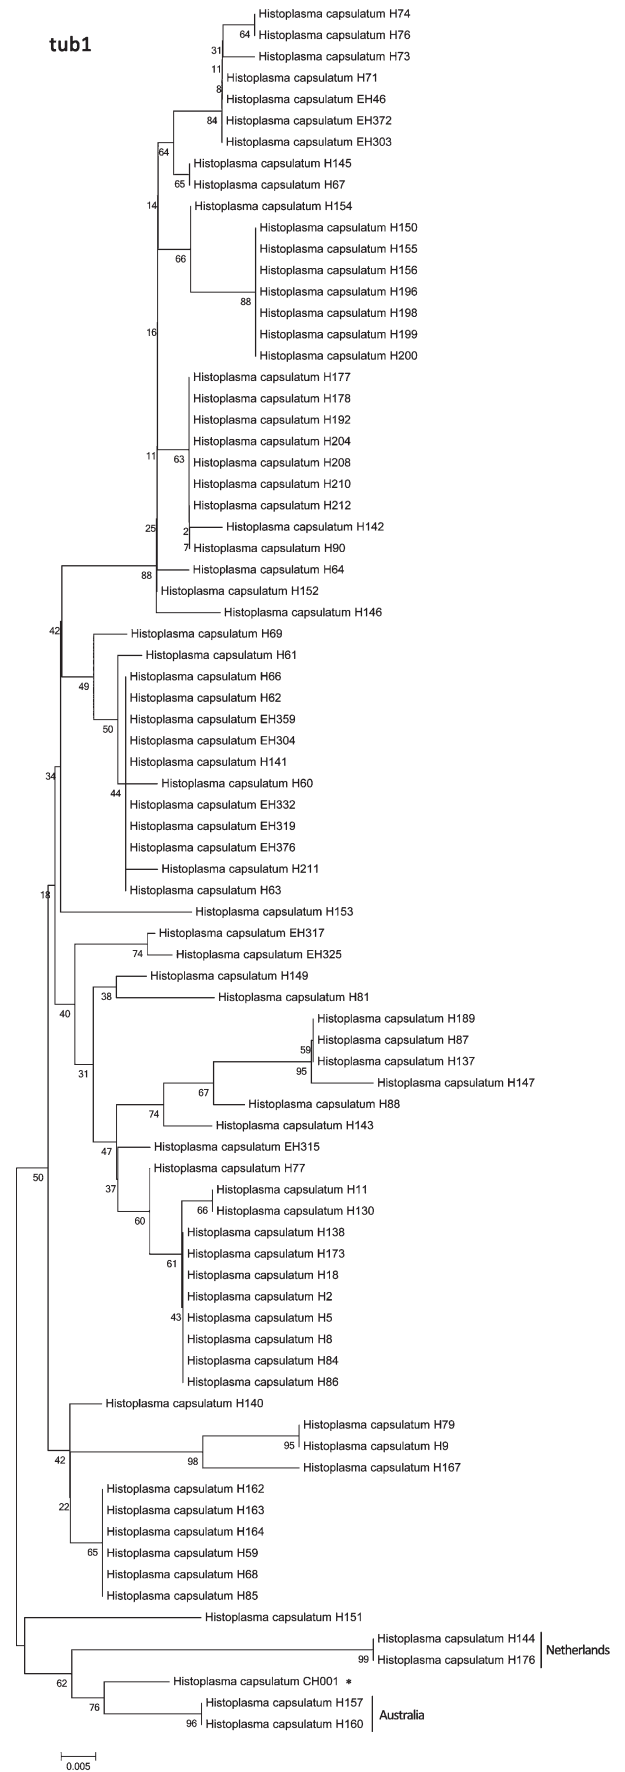

SUPPLEMENTAL FIGURE 4.

Supplement: SD7.pdf [file SD7.pdf]
